# Supplementary material for: Genome-Wide Characterization of Calmodulin and Calmodulin-like Protein Gene Families in Paulownia fortunei and Identification of Their Potential Involvement in Paulownia Witches’ Broom
Source: MDPI journal article supplement (doi:10.3390/genes14081540), 2023-07-27
Supplement: s1 [file s1]

Supplementary table 1. CaM/CML gene from *Arabidopsis thaliana* were used for identification.

| <b>Gene symbol</b> | <b>Gene locus</b> | <b>Gene symbol</b> | <b>Gene locus</b> |
|--------------------|-------------------|--------------------|-------------------|
| AtCaM1             | AT5G37780         | AtCML23            | AT1G66400         |
| AtCaM2             | AT2G41110         | AtCML24            | AT5G37770         |
| AtCaM3             | AT3G56800         | AtCML25            | AT1G24620         |
| AtCaM4             | AT1G66410         | AtCML26            | AT1G73630         |
| AtCaM5             | AT2G27030         | AtCML27            | AT1G18210         |
| AtCaM6             | AT5G21274         | AtCML28            | AT3G03430         |
| AtCaM7             | AT3G43810         | AtCML29            | AT5G17480         |
| AtCML1             | AT3G59450         | AtCML30            | AT2G15680         |
| AtCML2             | AT4G12860         | AtCML31            | AT2G36180         |
| AtCML3             | AT3G07490         | AtCML32            | AT5G17470         |
| AtCML4             | AT3G59440         | AtCML33            | AT3G03400         |
| AtCML5             | AT2G43290         | AtCML34            | AT3G03410         |
| AtCML6             | AT4G03290         | AtCML35            | AT2G41410         |
| AtCML7             | AT1G05990         | AtCML36            | AT3G10190         |
| AtCML8             | AT4G14640         | AtCML37            | AT5G42380         |
| AtCML9             | AT3G51920         | AtCML38            | AT1G76650         |
| AtCML10            | AT2G41090         | AtCML39            | AT1G76640         |
| AtCML11            | AT3G22930         | AtCML40            | AT3G01830         |
| AtCML12            | AT2G41100         | AtCML41            | AT3G50770         |
| AtCML13            | AT1G12310         | AtCML42            | AT4G20780         |
| AtCML14            | AT1G62820         | AtCML43            | AT5G44460         |
| AtCML15            | AT1G18530         | AtCML44            | AT1G21550         |
| AtCML16            | AT3G25600         | AtCML45            | AT3G29000         |
| AtCML17            | AT1G32250         | AtCML46            | AT5G39670         |
| AtCML18            | AT3G03000         | AtCML47            | AT3G47480         |
| AtCML19            | AT4G37010         | AtCML48            | AT2G27480         |
| AtCML20            | AT3G50360         | AtCML49            | AT3G10300         |
| AtCML21            | AT4G26470         | AtCML50            | AT5G04170         |
| AtCML22            | AT3G24110         |                    |                   |
