# Supplementary material for: Genome-Wide Characterization of Calmodulin and Calmodulin-like Protein Gene Families in Paulownia fortunei and Identification of Their Potential Involvement in Paulownia Witches’ Broom
Source: MDPI journal article supplement (doi:10.3390/genes14081540), 2023-07-27
Supplement: s1 [file s1]

Supplementary table 3. Orthologous gene pairs within *Paulownia fortunei*.

| Gene pair                       | Ka          | Ks          | Ka/Ks       |
|---------------------------------|-------------|-------------|-------------|
| <i>PfCaM1</i> & <i>PfCaM3</i>   | 0.002799817 | 0.532584536 | 0.005257037 |
| <i>PfCML3</i> & <i>PfCML58</i>  | 0.082598118 | 0.624698454 | 0.132220782 |
| <i>PfCML5</i> & <i>PfCML22</i>  | 0.181900751 | 1.58783172  | 0.114559212 |
| <i>PfCML6</i> & <i>PfCML29</i>  | 0.054898145 | 0.274407135 | 0.200060922 |
| <i>PfCML9</i> & <i>PfCML30</i>  | 0.101338948 | 0.562858584 | 0.180043356 |
| <i>PfCML11</i> & <i>PfCML34</i> | 0.114189206 | 0.474069019 | 0.240870425 |
| <i>PfCML11</i> & <i>PfCML37</i> | 0.512831281 | 2.478986707 | 0.206871331 |
| <i>PfCML12</i> & <i>PfCML44</i> | 0.152866087 | 0.291575854 | 0.524275535 |
| <i>PfCML14</i> & <i>PfCML43</i> | 0.0743213   | 0.676326031 | 0.109889752 |
| <i>PfCML15</i> & <i>PfCML45</i> | 0.038112078 | 0.533541903 | 0.071432211 |
| <i>PfCML17</i> & <i>PfCML36</i> | 0.008383879 | 0.325186018 | 0.025781793 |
| <i>PfCML18</i> & <i>PfCML42</i> | 0.052182695 | 0.327821739 | 0.159180094 |
| <i>PfCML19</i> & <i>PfCML35</i> | 0.090946641 | 0.440266056 | 0.206572003 |
| <i>PfCML20</i> & <i>PfCML49</i> | 0.01624479  | 0.663851673 | 0.024470511 |
| <i>PfCML21</i> & <i>PfCML46</i> | 0.094362603 | 0.557123495 | 0.16937466  |
| <i>PfCML24</i> & <i>PfCML33</i> | 0.474775434 | 1.903278627 | 0.249451356 |
| <i>PfCML24</i> & <i>PfCML40</i> | 0.246826559 | 0.809663993 | 0.304850606 |
| <i>PfCML28</i> & <i>PfCML47</i> | 0.171866549 | 5.524359628 | 0.031110674 |
| <i>PfCML50</i> & <i>PfCML57</i> | 0.004543747 | 0.016108002 | 0.282080137 |
| <i>PfCML51</i> & <i>PfCML53</i> | 0.044145138 | 0.098935755 | 0.446200042 |
| <i>PfCML51</i> & <i>PfCML55</i> | 0.08699095  | 0.101951154 | 0.85326106  |
| <i>PfCML52</i> & <i>PfCML54</i> | 0.051690415 | 0.11136     | 0.464173989 |
| <i>PfCML52</i> & <i>PfCML56</i> | 0.025400998 | 0.028466415 | 0.892314623 |

Notes: Ka, non-synonymous substitution rate; Ks, synonymous substitution rate
